# Supplementary material
Source: PubMed Central journal article supplement (PMC4511192)
Supplement: supp_fj.15-271213_Supplemental_Figure3.pdf [file supp_fj.15-271213_Supplemental_Figure3.pdf]

**Supplemental Figure 3:**

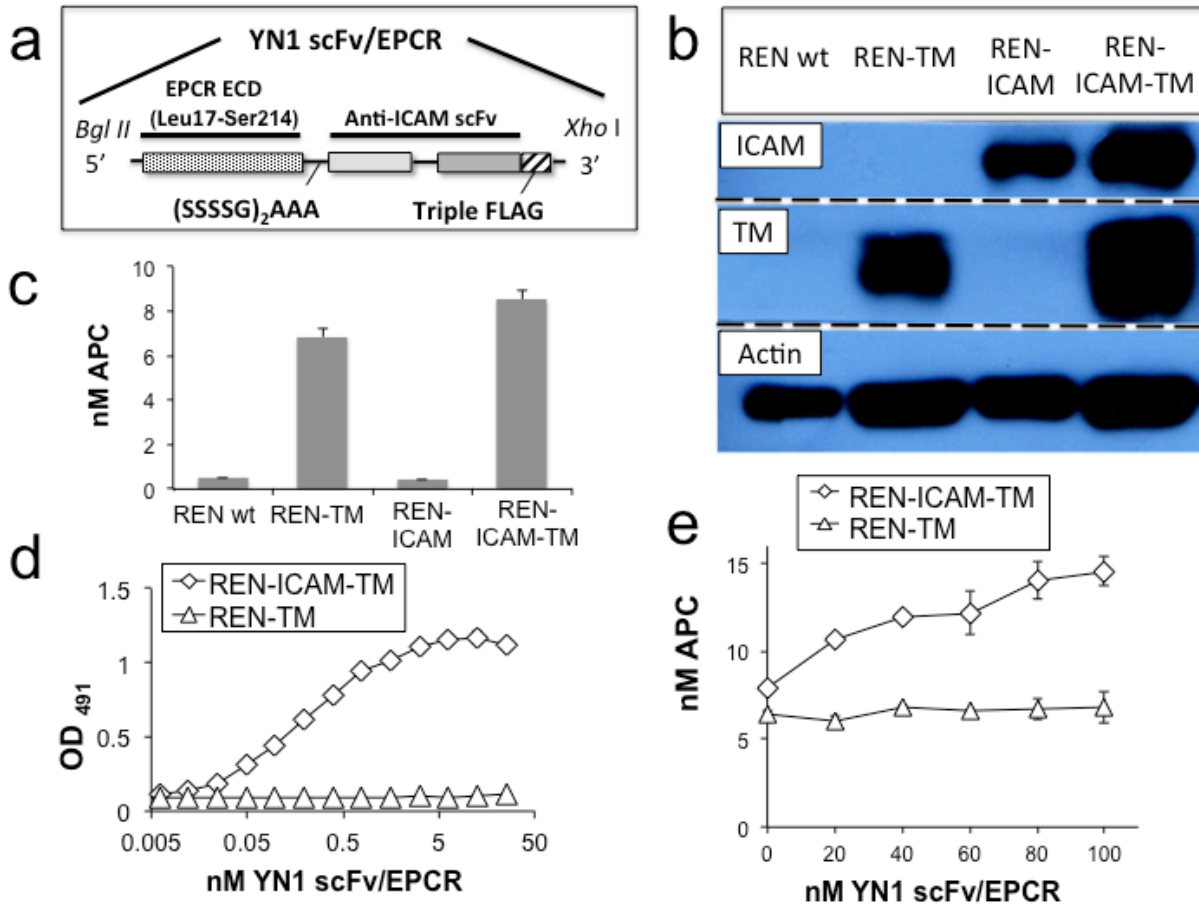

**Supplemental Figure 3.** (a) Molecular design of anti-ICAM/EPCR fusion protein. (b) To verify the functional activity of anti-ICAM/EPCR, REN-ICAM-TM cells were generated. Western blot shows expression of mouse ICAM-1 and TM. (c) Cell-based ELISA confirms binding of YN1 scFv/EPCR to REN-ICAM-TM but not REN-TM cells, and (d) the fusion protein enhances activation of protein C by surface expressed TM when bound to these cells.
