# Supplementary material
Source: PubMed Central journal article supplement (PMC4511192)
Supplement: supp_fj.15-271213_Supplemental_Figure4.pdf [file supp_fj.15-271213_Supplemental_Figure4.pdf]

Supplemental Figure 4:

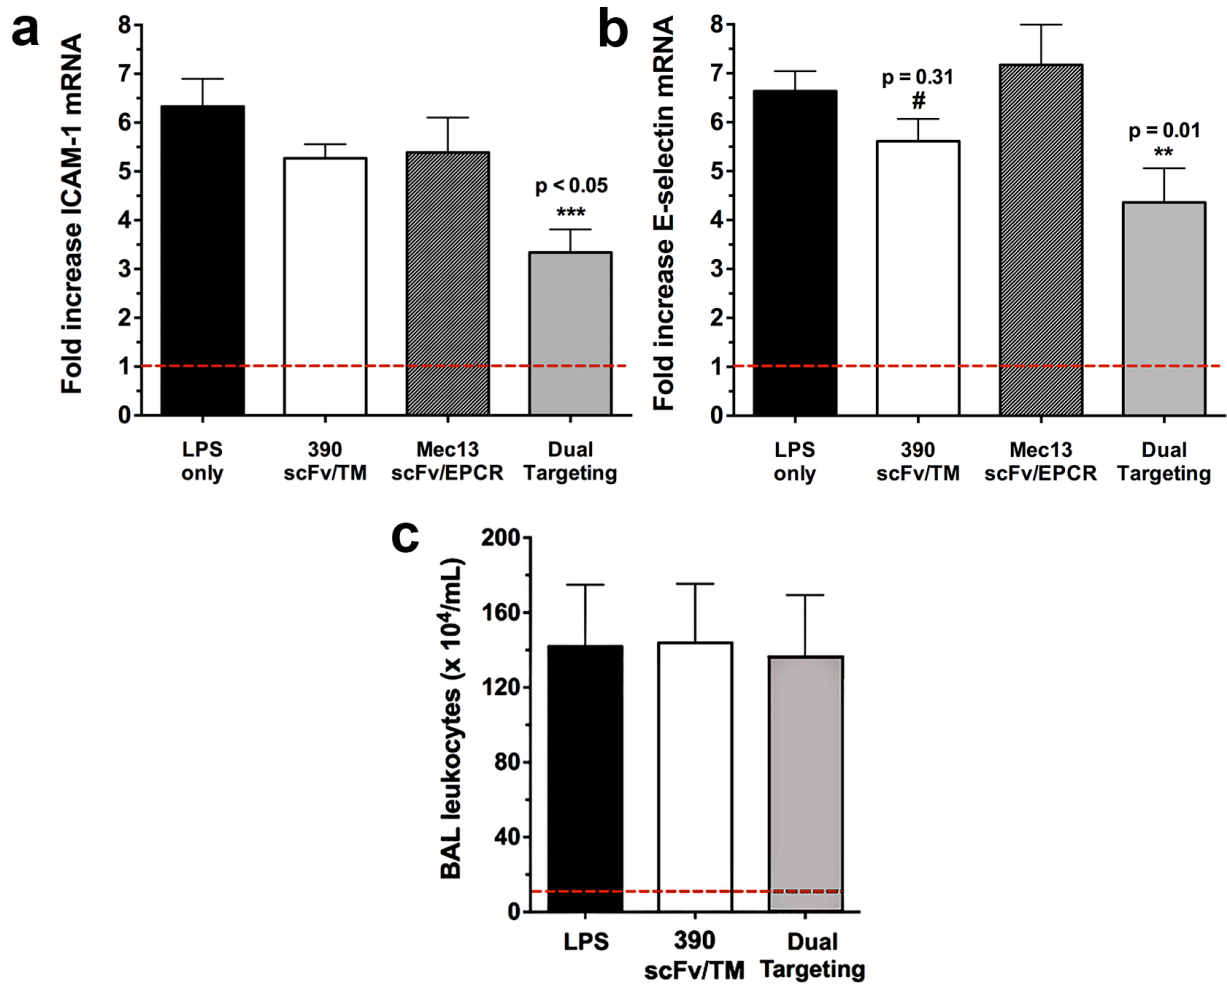

**Supplemental Figure 4.** (a) Pre-treatment with 390 scFv/TM and Mec13 scFv/EPCR suppresses LPS-induced expression of endothelial cell adhesion molecules: (a) ICAM-1; \*\*\*,  $p < 0.05$  vs. all other group, and (b) E-selectin; \*\*,  $p = 0.01$  for Dual Targeting vs. LPS only. Either fusion protein alone did not produce significant effect; #,  $p = 0.31$  for 390 scFv/TM vs. LPS only. (c) Bronchoalveolar lavage (BAL) white blood cells following LPS insult. No intervention had a significant impact on total leukocyte count. Dotted lines indicate outcomes in control animals that did not receive LPS.
